# Supplementary material for: Metabolic reprogramming of interleukin-17-producing γδ T cells promotes ACC1-mediated de novo lipogenesis under psoriatic conditions
Source: Springer Nature journal article supplement (doi:10.1038/s42255-025-01276-z), 2025-05-13
Supplement: MOESM1 [file 42255_2025_1276_MOESM1_ESM.pdf]

# Metabolic reprogramming of interleukin-17-producing $\gamma\delta$ T cells promotes ACC1-mediated de novo lipogenesis under psoriatic conditions

---

In the format provided by the  
authors and unedited

## Supplementary figures

| Metabolites    | Derivative | Quantification Ions                 | SIM window (min) | Fragment SumFormula | IL-7 #1 | IL-7+ IL-1β/IL-23 #1 | IL-7 #2 | IL-7+ IL-1β/IL-23 #2 | IL-7 #3 | IL-7+ IL-1β/IL-23 #3 |
|----------------|------------|-------------------------------------|------------------|---------------------|---------|----------------------|---------|----------------------|---------|----------------------|
| Alanine_260    | 2TBDMS     | 260 261 262 263 264                 | 8.80 - 9.20      | C11H26O2NSi2        | 0.01745 | 0.020532222          | 0.01896 | 0.029210502          | 0.0155  | 0.027832507          |
| Aspartate_418  | 3TBDMS     | 418 419 420 421 422 423             | 15.30-15.85      | C18H40NO4Si3        | 0.06831 | 0.066988438          | 0.04273 | 0.073393409          | 0.0721  | 0.061432246          |
| Citrate_591    | 4TBDMS     | 591 592 593 594 595 596 597         | 18.70-20.00      | C26H65O7Si4         | 0.01775 | 0.020829205          | 0.02635 | 0.042498064          | 0.012   | 0.039272436          |
| Fumarate_287   | 2TBDMS     | 287 288 289 290 291 292 293         | 11.85-12.30      | C12H23O4Si2         | 0.00187 | 0.044797683          | 0.00332 | 0.00611838           | 0.0568  | 0.055716567          |
| Glutamate_432  | 3TBDMS     | 432 433 434 435 436 437 438 439 440 | 16.40-16.80      | C19H42O4NSi3        | 0.25092 | 0.354060248          | 0.13976 | 0.301884746          | 0.2278  | 0.282295182          |
| Glycine_246    | 2TBDMS     | 246 247 248 249 250                 | 9.20 - 9.55      | C10H24O2NSi2        | 0.05372 | 0.05759285           | 0.06139 | 0.074974213          | 0.0571  | 0.053309111          |
| Isoleucine_302 | 2TBDMS     | 302 303 304 305 306 307             | 10.90-11.20      | C14H32NO2Si2        | 0.01436 | 0.015930293          | 0.03216 | 0.034657892          | 0.0076  | 0.047269931          |
| Lactate_261    | 2TBDMS     | 261 262 263 264 265                 | 8.00-8.80        | C11H25O3Si2         | 0.21036 | 0.346022733          | 0.33573 | 0.947924525          | 0.0969  | 0.440971438          |
| Leucine_302    | 2TBDMS     | 302 303 304 305 306 307             | 10.50-10.90      | C14H32NO2Si2        | 0.01686 | 0.018257785          | 0.01907 | 0.025883468          | 0.019   | 0.033826062          |
| Malate_419     | 3TBDMS     | 419 420 421 422 423 424             | 14.95-15.30      | C18H39O5Si3         | 0.00718 | 0.008454233          | 0.00541 | 0.013904947          | 0.0035  | 0.011065487          |
| Serine_390     | 3TBDMS     | 390 391 392 393 394 395 396         | 13.30-14.00      | C17H40NO3Si3        | 0.00611 | 0.007426206          | 0.00643 | 0.009968944          | 0.0039  | 0.010582759          |
| Succinate_289  | 2TBDMS     | 289 290 291 292 293 294             | 11.85-12.30      | C12H25O4Si2         | 0.01164 | 0.011730952          | 0.01709 | 0.02081603           | 0.0104  | 0.01942119           |
| Valine_288     | 2TBDMS     | 288 289 290 291 292                 | 10.00-10.50      | C13H30NO2Si2        | 0.00773 | 0.008451223          | 0.01107 | 0.015948441          | 0.0059  | 0.017705263          |

**Supplementary Fig. 1| Metabolite abundances of *in vitro*-expanded  $\gamma\delta$ T17 cells.** Cells were sorted on day 6 and cultured with interleukin (IL)-7 for 3 days. On day 9, cells were re-seeded and stimulated with IL-7 either alone (homeostatic conditions) or combined with IL-1 $\beta$  and IL-23 (psoriatic conditions) for 48 h. Cells were collected on day 11, metabolites were extracted and measured by GC-MS in selected ion monitoring mode (SIM). Normalized metabolite abundance data of biological replicates from three independent experiments are shown in the table.

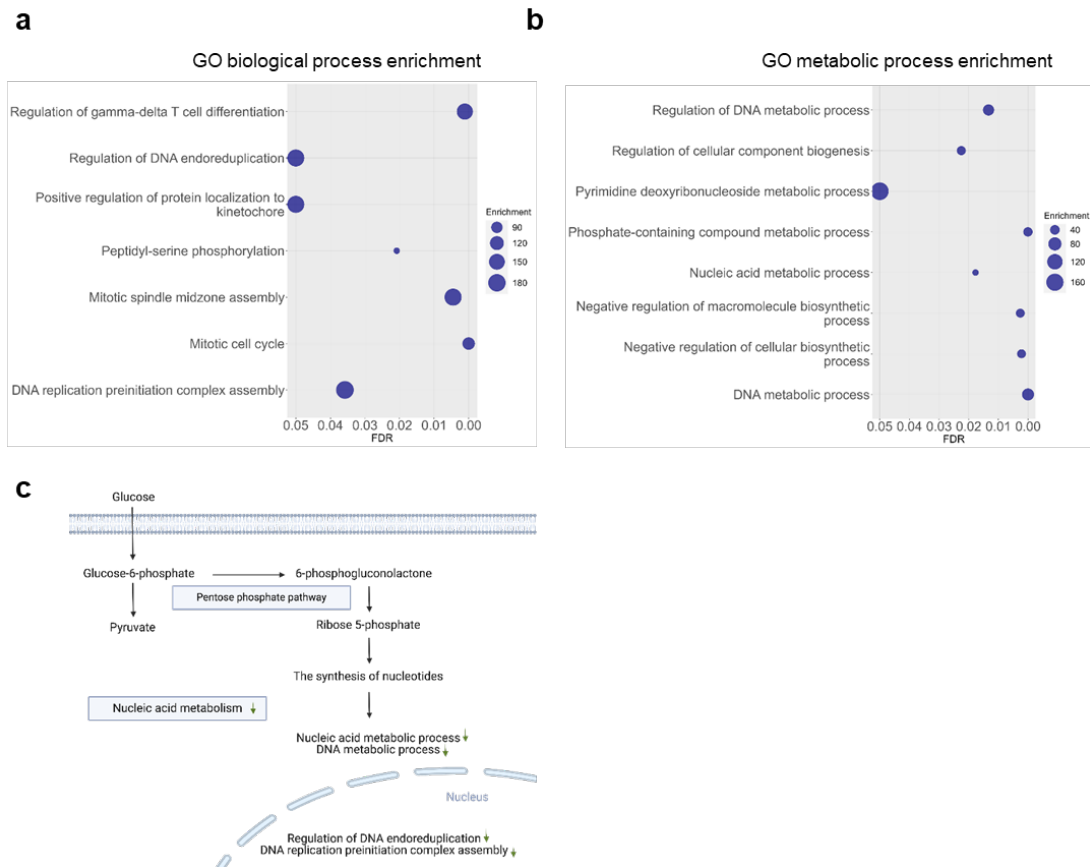

**Supplementary Fig. 2|  $\gamma\delta$ T17 cells downregulate the DNA metabolic process under psoriatic conditions.** On day 9, *in-vitro*-expanded  $\gamma\delta$ T17 cells were re-seeded and stimulated with IL-7 alone (homeostatic conditions) or combined with IL-1 $\beta$  and IL-23 (psoriatic conditions) for 24 h before proteomic analysis. GO pathway enrichment analysis of biological process **a** and metabolic process **b**; proteins downregulated (blue) under psoriatic versus homeostatic conditions are shown. **c**, Schematic model of the pathway analysis with downregulated proteins under psoriatic versus homeostatic conditions. The enrichment scores and false discovery rate (FDR) were estimated using STRING. Data from four independent experiments were collected for the proteomic analysis, and *p*-values were obtained using the two-sided Benjamini-Hochberg corrected t-test. *p*<0.01 indicates statistically significant differences. **c**, Schematic model of pathway analysis of differentially expressed proteins under psoriatic versus homeostatic conditions was created in BioRender. Kao, Y. (2025) <https://BioRender.com/s59i821>.

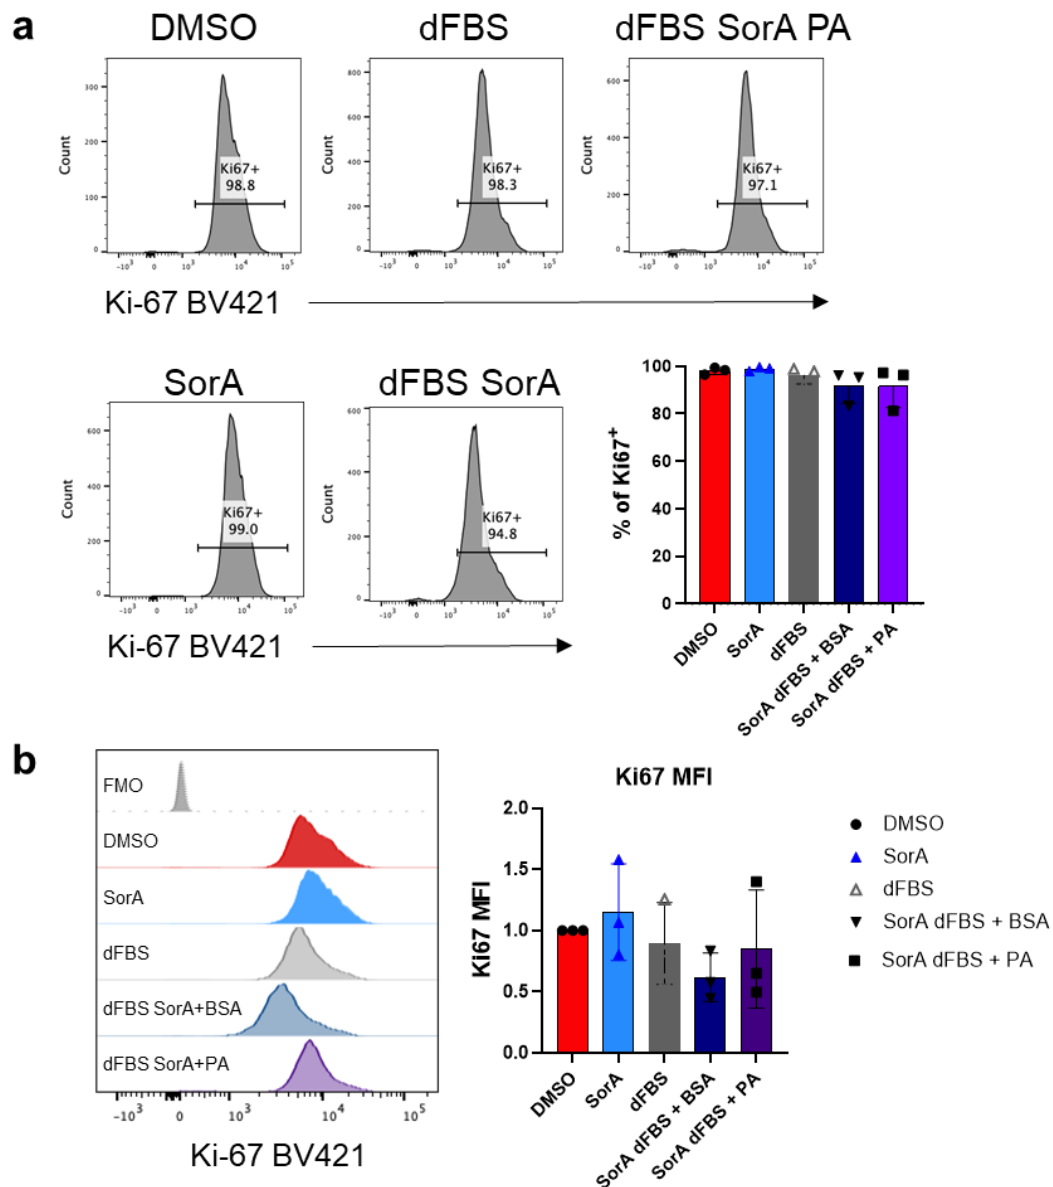

**Supplementary Fig. 3| FAS inhibition does not affect  $\gamma\delta$ T17 proliferation in the *in vitro* culture of  $\gamma\delta$ T17 cells for 24 h.** *In vitro*-expanded  $\gamma\delta$ T17 cells were sorted on day 6 and cultured with IL-7 for 3 days. On day 9, cells were re-seeded and stimulated with either IL-7 (homeostatic conditions) or a combination of IL-1 $\beta$  and IL-23 (psoriatic conditions) for 24 h. **a**, The percentage, and **b**, the mean fluorescence intensities (MFIs) of Ki-67 expression in  $\gamma\delta$ T17 cells after 24-h culture under DMSO control, SorA, or delipidated medium (dFBS) conditions as indicated. Pooled means from three independent experiments are shown. Error bars represent standard deviation (SD), and *p*-values were determined using the one-way ANOVA. ns *p*>0.05.

## a Skin-draining LNs

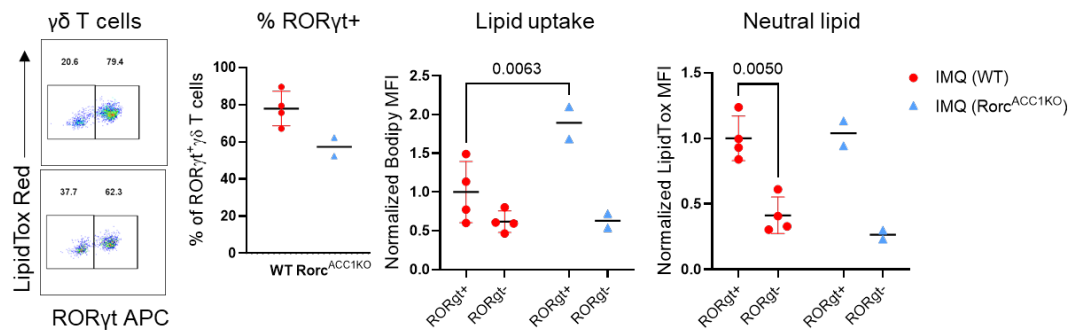

## b Skin

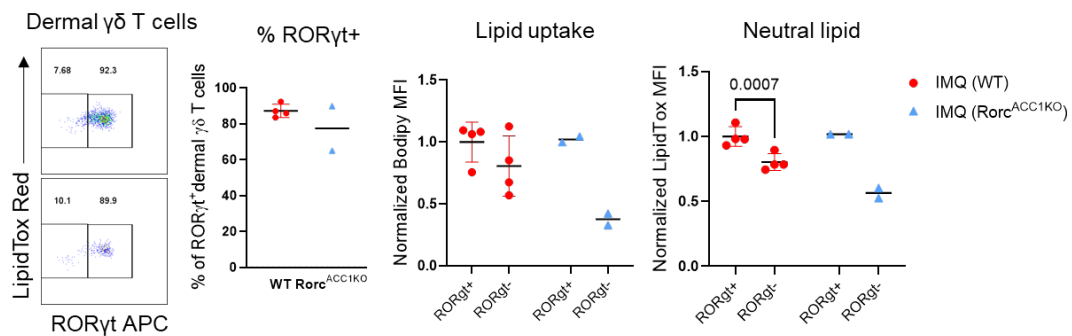

**Supplementary Fig. 4| Genetic ablation of ACC1 in RORyt<sup>+</sup>  $\gamma\delta$ T17 cells increases compensatory lipid uptake in the skin-draining LNs.** The ears and back skin of wild-type (WT) or Rorc<sup>ACC1KO</sup> model mice were treated topically with imiquimod (IMQ) for six consecutive days. **a**, Flow cytometry gating strategy and for identifying RORyt<sup>+</sup>  $\gamma\delta$  T cells to evaluate lipid uptake and intracellular neutral lipid content within skin-draining LNs of the treated ear areas on day 6. **b**, Flow cytometry gating strategy and for identifying RORyt<sup>+</sup> among dermal  $\gamma\delta$  T cells to evaluate lipid uptake and intracellular neutral lipid content within skin areas of the treated ear areas on day 6. Error bars represent standard deviation (SD), and p-values were obtained using the two-way ANOVA. ns p>0.05.
